# Supplementary material
Source: PubMed Central journal article supplement (PMC7400766)
Supplement: NIHMS1605508-supplement-Acknowledgments.pdf [file NIHMS1605508-supplement-Acknowledgments.pdf]

# Acknowledgments

The PRO-cision Medicine Methods Toolkit paper series was funded by Genentech. We appreciate the input from our Steering Group who helped us identify the topics and paper authors included in this paper series. The Steering Group includes Ethan Basch, MSc, MD (uncompensated); Karon Cook, PhD; Amylou Dueck, PhD; Dennis Revicki, PhD; Jeff Sloan, PhD; and Carrie Stricker, PhD, RN. We would also like to thank all the paper authors for their contributions to this supplement. A special thanks to Yonaira Rivera, MPH, for her assistance with this supplement.
